# Supplementary material for: Genomic-Mediated Breeding Strategies for Global Warming in Chickpeas (Cicer arietinum L.)
Source: MDPI journal article supplement (doi:10.3390/agriculture13091721), 2023-08-30
Supplement: s1 [file s1]

**Table S1.** Different QTLs reported in chickpea under drought stress

| SN | Mapping population | Population size | Trait                        | Marker /marker interval      | Marker type  | LOD | Genes/ QTLs                     | Interval/ position (cM) | Linkage group | Ref.              |
|----|--------------------|-----------------|------------------------------|------------------------------|--------------|-----|---------------------------------|-------------------------|---------------|-------------------|
| 1  | ICC4958 × Annigeri | 257             | Root Traits                  | TAA 170                      | SSR          |     | Major QTL                       | 54.56                   | LG4           | Gaur et al. 2008  |
| 2  | JG 62 × Vijay      | 197             | Plant height                 | TS72-GA24R, TA144-TR2s       | SSR          |     | QPh.t.ncl-1.3,<br>QPh.t.ncl-6.1 | 12.0<br>5.0             | LG1<br>LG6    | Gowda et al. 2011 |
|    |                    |                 | Plant spread                 | NCPGR81-TA116y               | SSR          |     | QPsp.ncl-2.2                    | 2.0                     | LG2           |                   |
|    |                    |                 | Number of branches per plant | NCPGR79-GA26                 | SSR,<br>RAPD |     | QBrp.ncl-2.4                    | 3.0                     | LG2           |                   |
|    |                    |                 |                              | UBC17-TA194s                 |              |     | QBrp.ncl-5.1                    | 6.0                     | LG5           |                   |
|    |                    |                 |                              | TS45-NCPGR50                 |              |     | QBrp.ncl-6.1                    | 2.0                     | LG6           |                   |
|    |                    |                 | Number of pods per plant     | UBC760-TA64                  | RAPD,<br>SSR |     | QPdp.ncl-2.4                    | 3.0                     | LG2           |                   |
|    |                    |                 |                              | TA186-SSR5                   |              |     | QPdp.ncl-1.1                    | 5.0                     | LG1a          |                   |
|    |                    |                 | Yield per plant              | UBC696-TS83                  | RAPD,<br>SSR |     | QYld.ncl-8.1                    | 3.0                     | LG8           |                   |
|    |                    |                 | 100-seed weight              | STMS10-TR56                  | STMS,<br>SSR |     | QSwt.ncl-2.1                    | 5.0                     | LG2           |                   |
| 3  | Vijay × ICC4958    | 108             | Plant height                 | TS35-TR29s,<br>UBC859x-TA127 | SSR,<br>ISSR |     | QPh.t.ncl-1.7,<br>QPh.t.ncl-5.1 | 5.0<br>8.0              | LG1a<br>LG5   | Gowda et al. 2011 |

|                     |                                     |              |  |                                    |                                                                           |               |  |                                                                 |      |      |                       |
|---------------------|-------------------------------------|--------------|--|------------------------------------|---------------------------------------------------------------------------|---------------|--|-----------------------------------------------------------------|------|------|-----------------------|
|                     |                                     |              |  | Plant spread                       | UBC721-TA146, TA34s-<br>NCPGR69, TA117-C4D02,<br>UBC743y-TA117            | RAPD,<br>SSR  |  | QPsp.ncl-1.6,                                                   | 3.0  | LG1a | Rehman et al.<br>2011 |
|                     |                                     |              |  |                                    |                                                                           |               |  | QPsp.ncl-2.6,                                                   | 8.0  | LG2  |                       |
|                     |                                     |              |  |                                    |                                                                           |               |  | QPsp.ncl-3.2,                                                   |      |      |                       |
|                     |                                     |              |  |                                    |                                                                           |               |  | QPsp.ncl-3.3                                                    | 4.0  | LG3  |                       |
|                     |                                     |              |  |                                    |                                                                           |               |  | 7.0                                                             | LG3  |      |                       |
|                     |                                     |              |  | Number of<br>branches per<br>plant | TAA170-NCPGR98                                                            | SSR           |  | QBrp.ncl-1.6                                                    | 3.0  | LG1a |                       |
|                     |                                     |              |  |                                    |                                                                           |               |  |                                                                 |      |      |                       |
|                     |                                     |              |  | Number of<br>pods per<br>plant     | UBC721-TA146, TA43-<br>TA116x, H1A10x-<br>H3GO3/2,<br><br>UBC190y-UBC249z | RAPD,<br>SSR, |  | QPdp.ncl-1.4,<br>QPdp.ncl-2.3,<br>QPdp.ncl-3.3,<br>QPdp.ncl-7.3 | 51.6 | LG1a |                       |
|                     |                                     |              |  |                                    |                                                                           |               |  |                                                                 | 46.8 | LG2  |                       |
|                     |                                     |              |  |                                    |                                                                           |               |  |                                                                 | 58.5 | LG3  |                       |
|                     |                                     |              |  |                                    |                                                                           |               |  |                                                                 | 95.3 | LG7  |                       |
|                     |                                     |              |  | Yield per<br>plant                 | SSR6x-GA24, TA5-<br>NCPGR56                                               | SSR           |  | QYld.ncl-1.6,<br>QYld.ncl-2.2                                   | 60.4 | LG1a |                       |
|                     |                                     |              |  |                                    |                                                                           |               |  |                                                                 | 33.9 | LG2  |                       |
|                     |                                     |              |  | 100-seed<br>weight                 | UBC335y-UBC173, TA110-<br>HIB09                                           | RAPD,<br>SSR  |  | QSwt.ncl-1.12,<br>QSwt.ncl-5.1                                  | 34.6 | LG1a |                       |
|                     |                                     |              |  |                                    |                                                                           |               |  |                                                                 | 38.4 | LG5  |                       |
| Days to<br>maturity | UBC149z-UBC149x,<br>H3A05/2-NCPGR57 | RAPD,<br>SSR |  | QDmt.ncl-1.4,<br>QDmt.ncl-4.2      | 67.0                                                                      | LG1a          |  |                                                                 |      |      |                       |
|                     |                                     |              |  |                                    | 35.6                                                                      | LG4           |  |                                                                 |      |      |                       |

|   |                       |     |                      |             |     |      |      |      |     |                       |
|---|-----------------------|-----|----------------------|-------------|-----|------|------|------|-----|-----------------------|
| 4 | ILC 588 × ILC<br>3279 | 155 | Grain Yield          | H5A08-TA8   | SSR | 3.1  | Q1-1 | 0.4  | LG1 | Rehman et al.<br>2011 |
|   |                       |     |                      | H1B17-TA72  |     | 2.5  | Q4-1 | 3.0  | LG4 |                       |
|   |                       |     | Days to<br>flowering | H5A08-TA8   | SSR | 7.5  | Q1-1 | 0.4  | LG1 |                       |
|   |                       |     |                      | TA6-NCPGR12 |     | 10.9 | Q3-1 | 13.1 | LG3 |                       |

|                         |               |     |      |      |      |     |
|-------------------------|---------------|-----|------|------|------|-----|
|                         | TA132-GA137   |     | 2.9  | Q4-2 | 13.8 | LG4 |
|                         | TA159-GA6     |     | 3.7  | Q8-2 | 2.4  | LG8 |
| Days to maturity        | H5A08-TA8     | SSR | 8.2  | Q1-1 | 0.4  | LG1 |
|                         | TA6-NCPGR12   |     | 17.1 | Q3-1 | 13.1 | LG3 |
|                         | TA28-CaSTMS25 |     | 3.2  | Q7-1 | 8.5  | LG7 |
| Reproductive period     | H5A08-TA8     | SSR | 3.4  | Q1-1 | 0.4  | LG1 |
|                         | TA6-NCPGR12   |     | 12.8 | Q3-1 | 13.1 | LG3 |
|                         | TA28-CaSTMS25 |     | 3.0  | Q7-1 | 8.5  | LG7 |
| Plant height            | H5A08-TA8     | SSR | 9.6  | Q1-1 | 0.4  | LG1 |
|                         | H1B17-TA2     |     | 2.4  | Q4-3 | 3.0  | LG4 |
| Harvest index           | H5A08-TA8     | SSR | 6.0  | Q1-1 | 0.4  | LG1 |
|                         | TA6-NCPGR12   |     | 10.5 | Q3-1 | 13.1 | LG3 |
| Drought tolerance score | H5A08-TA8     | SSR | 6.2  | Q1-1 | 0.4  | LG1 |
|                         | TA6-NCPGR12   |     | 13.4 | Q3-1 | 13.1 | LG3 |
|                         | TA28-CaSTMS25 |     | 2.9  | Q7-1 | 8.5  | LG7 |
|                         | TS12-TA118    |     | 2.7  | Q8-1 | 11.0 | LG8 |
| Stomatal conductance    | TA28-CaSTMS25 | SSR | 2.4  | Q7-1 | 8.5  | LG7 |
|                         | TA180-H1A10   |     | 2.6  | Q7-2 | 0.9  | LG7 |
|                         | TA125-NCPGR10 |     | 2.6  | Q3-3 | 5.6  | LG3 |

|   |                   |     |                                                                                    |              |     |      |       |       |        |                      |
|---|-------------------|-----|------------------------------------------------------------------------------------|--------------|-----|------|-------|-------|--------|----------------------|
|   |                   |     | Canopy temperature differential [Canopy temperature minus air temperature (Tc-Ta)] | H5A08-TA8    | SSR | 5.0  | Q1-1  | 0.4   | LG1    |                      |
|   |                   |     |                                                                                    | TA6-TS58     |     | 2.4  | Q3-2  | 7.5   | LG3    |                      |
|   |                   |     |                                                                                    | GA137-TA46   |     | 3.0  | Q4-4  | 15.5  | LG4    |                      |
|   |                   |     |                                                                                    | TR7-TA14     |     | 2.9  | Q6-1  | 3.1   | LG6    |                      |
|   |                   |     |                                                                                    | TA80-GA21    |     | 2.9  | Q6-2  | 1.0   | LG6    |                      |
|   |                   |     |                                                                                    | GA21-CaSTMS2 |     | 3.0  | Q6-3  | 9.8   | LG6    |                      |
| 5 | JG 11 × ICC4958   | -   | Root traits and other drought tolerance traits                                     | ICCM0249     | SSR | -    | QTL   | 54.52 | CaLG04 | Varshney et al. 2013 |
|   |                   |     |                                                                                    | TAA170       |     |      |       | 54.56 | CaLG04 |                      |
|   |                   |     |                                                                                    | STMS11       |     |      |       | 82.25 | CaLG04 |                      |
| 6 | ILC588 × ILC 3279 | 181 | Drought resistance score                                                           | H6C-07       | SSR | 5.19 | DRS   | -     | LG3    | Hamwiah et al. 2013  |
|   |                   |     |                                                                                    | H5G-01       |     | 2.03 |       |       | LG4    |                      |
|   |                   |     | Percentage of empty pods                                                           | TA-1         | SSR | 2.05 | Epod  | -     | LG1    |                      |
|   |                   |     |                                                                                    | H1O-06       |     | 2.28 |       |       | LG2    |                      |
|   |                   |     | Grain yield                                                                        | H6C-07       | SSR | 2.18 | GY    | -     | LG3    |                      |
|   |                   |     |                                                                                    | H5G-01       |     | 2.28 |       |       | LG4    |                      |
|   |                   |     | 100-seed weight                                                                    | NCPGR-50     | SSR | 3.12 | 100sw | -     | LG3    |                      |
|   |                   |     |                                                                                    | SCEA19       |     | 2.29 |       |       | LG7    |                      |
|   |                   |     |                                                                                    | TAA-58       |     | 2.24 |       |       | LG5    |                      |
|   |                   |     |                                                                                    | H1H-15       |     | 3.88 |       |       | LG4    |                      |
|   |                   |     | Pod number                                                                         | H6C-07       | SSR | 5.09 | Pod   | -     | LG3    |                      |

|   |                                     |     |                        |              |     |       |             |      |        |                         |
|---|-------------------------------------|-----|------------------------|--------------|-----|-------|-------------|------|--------|-------------------------|
|   |                                     |     |                        | TAA-55       |     | 2.02  |             |      | LG7    |                         |
|   |                                     |     |                        | H5G-01       |     | 2.32  |             |      | LG4    |                         |
|   |                                     |     | Days to<br>flowering   | H6C-07       | SSR | 6.07  | DFLR        | -    | LG3    |                         |
|   |                                     |     |                        | H1B-17       |     | 2.53  |             |      | LG4    |                         |
|   |                                     |     | Days to<br>maturity    | TA-203       | SSR | 2.02  | MAT         | -    | LG1    |                         |
|   |                                     |     |                        | H6C-07       |     | 4.26  |             |      | LG3    |                         |
|   |                                     |     |                        | H2B-061      |     | 2.22  |             |      | LG2    |                         |
|   |                                     |     |                        | H1B-17       |     | 2.56  |             |      | LG4    |                         |
| 7 | ICC 4958 ×<br>ICC1882<br>(ICCRIL03) | 264 | Root length<br>density | NCPGR127 -   | SSR | 4.78  | QR3rld01    | 10.7 | CaLG04 | Varshney et al.<br>2014 |
|   |                                     |     |                        | NCPGR21      |     | -     |             |      |        |                         |
|   |                                     |     |                        |              |     | -     |             |      |        |                         |
|   |                                     |     | Plant height           | TA106-GA26   | SSR | -     | QR3pht01    | 15.5 | CaLG06 |                         |
|   |                                     |     |                        | TA34-NCPGR49 |     | -     | QR3pht02    | 1.0  | CaLG03 |                         |
|   |                                     |     |                        | NCPGR127 -   |     | 16.55 | QR3pht03    | 10.7 | CaLG04 |                         |
|   |                                     |     |                        | NCPGR21      |     |       |             |      |        |                         |
|   |                                     |     | Pods/plant             | NCPGR127 -   | SSR | 13.14 | QR3pod01    | 10.7 | CaLG04 |                         |
|   |                                     |     |                        | NCPGR21      |     |       |             |      |        |                         |
|   |                                     |     | 100-Seed<br>weight     | NCPGR127 -   | SSR | 32.38 | QR3100sdw03 | 10.7 | CaLG04 |                         |
|   |                                     |     |                        | NCPGR21      |     |       |             |      |        |                         |

|                                                 |                   |     |      |          |      |        |
|-------------------------------------------------|-------------------|-----|------|----------|------|--------|
| Root dry weight/Total plant dry weight (RTR, %) | TAA170 -          | SSR | 7.59 | QR3rtr01 | 3.0  | CaLG04 |
|                                                 | NCPGR21           |     |      |          |      |        |
| Stem dry weight                                 | TAA170 -          | SSR | 7.97 | QR3sdw01 | 3.0  | CaLG04 |
|                                                 | NCPGR21           |     |      |          |      |        |
| Primary branches                                | TAA170 -          | SSR | -    | QR3bm03  | 3.0  | CaLG04 |
|                                                 | NCPGR21           |     | 3.01 | QR3bm05  |      | CaLG08 |
|                                                 | TA118 -           |     |      |          |      |        |
|                                                 | HIII6             |     |      |          |      |        |
| Days to 50% flowering                           | NCPGR164 -        | SSR | 9.63 | QR3df01  | 8.5  | CaLG08 |
|                                                 | CaM1918           |     | -    | QR3df04  | 3.0  | CaLG04 |
|                                                 | TAA170-NCPGR 21   |     |      |          |      |        |
| Harvest index                                   | cpPb-679915       | SSR | 4.96 | QR3hi06  | 12.0 | CaLG01 |
|                                                 | - CaM0393         |     | -    | QR3hi03  | 18.0 | CaLG01 |
|                                                 | TAA170 -          |     |      |          |      |        |
|                                                 | NCPGR21           |     |      |          |      |        |
| Days to maturity                                | NCPGR127 - TAA170 | SSR | 8.75 | QR3dm01  | 8.5  | CaLG08 |
|                                                 | TAA170 -          |     | -    | QR3dm04  | 3.0  | CaLG04 |
|                                                 | NCPGR21           |     | -    | QR3dm03  | 14.0 | CaLG06 |
|                                                 | GA26-CaM0399      |     |      |          |      |        |

|   |                             |                       |                           |                       |     |   |                    |      |        |                      |
|---|-----------------------------|-----------------------|---------------------------|-----------------------|-----|---|--------------------|------|--------|----------------------|
|   |                             |                       | Yield                     | NCPGR90- TA8          | SSR | - | <i>QR3yld03</i>    | 10.0 | CaLG01 |                      |
|   |                             |                       |                           | TAA170 -              |     | - | <i>QR3yld04</i>    | 18.0 | CaLG04 |                      |
|   |                             |                       |                           | cpPb-680552           |     |   |                    | 2.0  |        |                      |
|   |                             |                       | Drought tolerance indices | NCPGR90- TA8          | SSR | - | <i>QR3dti03</i>    | 10.0 | CaLG01 |                      |
|   |                             |                       | Root surface area         | TA106-GA26            | SSR | - | <i>QR3rsa02</i>    | 15.5 | CaLG06 |                      |
| 8 | ICC 283 × ICC 8261(ICCRL04) | 288                   | Plant height              | CaM0772-TS45          | SSR | - | <i>QR4pht02</i>    |      | CaLG08 | Varshney et al. 2014 |
|   |                             |                       |                           | CaM2029-TA11          |     |   | <i>QR4pht04</i>    |      | CaLG05 |                      |
|   |                             | Days to 50% flowering |                           | CaM1753- cpPb-677529, | SSR | - | <i>QR4df01</i>     |      | CaLG03 |                      |
|   |                             |                       |                           | TA103II-TA122         |     | - | <i>QR4df06</i>     |      | CaLG01 |                      |
|   |                             |                       |                           | ICCeM0015-NCPGR200    |     | - | <i>QR4df02</i>     |      | CaLG06 |                      |
|   |                             |                       |                           | CaM0772-TA118         |     | - | <i>QR4df03</i>     |      | CaLG08 |                      |
|   |                             | Days to maturity      |                           | TA103II-TA122'        | SSR | - | ' <i>QR4dm05</i>   |      | CaLG01 |                      |
|   |                             |                       |                           | CaM2029-TA11          |     | - | ' <i>QR4dm07</i>   |      | CaLG05 |                      |
|   |                             |                       |                           | ICCeM0015-NCPGR200    |     | - | ' <i>QR4dm03</i>   |      | CaLG06 |                      |
|   |                             | 100SW                 |                           | CaM2093-ICCM0249      | SSR | - | <i>QR4100sdw02</i> |      | CaLG04 |                      |
|   |                             |                       | POD                       | CaM0772- TS45'        | SSR | - | <i>QR4pod02</i>    |      | CaLG08 |                      |

|   |                     |     |                                                  |                                   |     |       |                      |      |                  |                  |
|---|---------------------|-----|--------------------------------------------------|-----------------------------------|-----|-------|----------------------|------|------------------|------------------|
|   |                     |     | Drought tolerance indices                        | NCPGR136- TA203<br>TA103II-TA122' | SSR | -     | QR4dti02<br>QR4dti03 |      | CaLG01<br>CaLG01 |                  |
|   |                     |     | Yield                                            | TA 59-TA200<br>NCPGR273-CaM0051   | SSR | -     | QR4yld02<br>QR4yld03 |      | CaLG02<br>CaLG03 |                  |
|   |                     |     | Harvest index                                    | CaM0317-CaM1257                   | SSR |       | QR4hi02              |      | CaLG06           |                  |
| 9 | ICC 4958 × ICC 1882 | 232 | Root length density                              | bin_4_13239546 - bin_4_13378761   | SNP | 5.23  | QTL                  | 0.23 | CaLG04           | Kale et al. 2015 |
|   |                     |     | Plant height                                     | bin_4_13239546 - bin_4_13378761   | SNP | 24.34 | QTL                  | 0.23 | CaLG04           |                  |
|   |                     |     | pods/plant                                       | bin_4_13239546 - bin_4_13378761   | SNP | 9.82  | QTL                  | 0.23 | CaLG04           |                  |
|   |                     |     | 100-seed weight                                  | bin_4_13239546 - bin_4_13378761   | SNP | 43.56 | QTL                  | 0.23 | CaLG04           |                  |
|   |                     |     | physiological trait: delta carbon ratio          | bin_4_13239546 - bin_4_13378761   | SNP | 6.11  | QTL                  | 0.23 | CaLG04           |                  |
|   |                     |     | root dry weight/total plant dry weight ratio (%) | bin_4_13393647 - bin_4_13547009   | SNP | 10.57 | QTL                  | 0.22 | CaLG04           |                  |
|   |                     |     | morphological traits: shoot dry weight (g)       | bin_4_13393647 - bin_4_13547009   | SNP | 13.78 | QTL                  | 0.22 | CaLG04           |                  |
|   |                     |     | primary branches                                 | bin_8_6034209 - bin_8_5984553     | SNP | 5.70  | QTL                  | 9.47 | CaLG08           |                  |

|    |                     |     |                                                  |                                 |     |            |                                          |            |        |                        |
|----|---------------------|-----|--------------------------------------------------|---------------------------------|-----|------------|------------------------------------------|------------|--------|------------------------|
|    |                     |     | Days to 50% flowering                            | bin_8_6034209 - bin_8_5984553   | SNP | 28.19      | QTL                                      | 9.47       | CaLG08 |                        |
|    |                     |     | Harvest index                                    | bin_8_6034209 - bin_8_5984553   | SNP | 8.01       | QTL                                      | 9.47       | CaLG08 |                        |
|    |                     |     | days to maturity                                 | bin_7_12870961 - bin_7_12856579 | SNP | 19.53      | QTL                                      | 0.23       | CaLG07 |                        |
| 10 | ICC 4958 × ICC 1882 | 264 | Root length density                              | ICCM0065 -Ca4_11276225;         | SSR | 4.59       | QR3rld01.1;<br>QR3rld01.2;<br>QR3rld01.3 | 3.23       | CaLG04 | Jaganathan et al. 2015 |
|    |                     |     |                                                  | Ca4_13687456 - NCPGR21;         |     | 7.09       |                                          | 5.14       |        |                        |
|    |                     |     |                                                  | Ca4_13840227 - NCPGR21          |     | 6.20       |                                          | 5.37       |        |                        |
|    |                     |     | Plant height                                     | STMS11 - CaM0615,               | SSR | 9.02       | QR3pht11,<br><br>QR3pht11,<br>QR3pht12   | 3.80       | CaLG04 |                        |
|    |                     |     |                                                  | Ca8_4106644 - CISR80            |     | 8.06       |                                          | 3.80       | CaLG08 |                        |
|    |                     |     |                                                  | Ca8_4106644 - CISR80            |     | 18.75      |                                          | 13.44      | CaLG08 |                        |
|    |                     |     | Pods/plant                                       | Ca4_13687456- TAA170            | SSR | 5.34-18.79 | 10 QTL                                   | 0.86-5.37  | CaLG04 |                        |
|    |                     |     | 100-seed weight                                  | Ca4_13687456- TAA170            | SSR | 50.13      | 41 QTL                                   | 1.81-15.41 | CaLG04 |                        |
|    |                     |     | Root dry weight/total plant dry weight ratio (%) | Ca4_12558541 - Ca4_11276225,    | SSR | -          | QR3rtr01.1,                              | 1.81       | CaLG04 |                        |
|    |                     |     |                                                  | Ca4_13840227 - TAA170,          |     | -          | QR3rtr01.2,                              | 4.39       |        |                        |
|    |                     |     |                                                  | ICCM0065 - Ca4_13588956,        |     | -          | QR3rtr01.3,                              | 2.39       |        |                        |
|    |                     |     |                                                  | Ca4_13840227 - NCPGR21          |     | 8.96       | QR3rtr01.4                               | 5.37       |        |                        |
|    |                     |     | morphologic al traits:                           | Ca4_12558541 - Ca4_11276225,    | SSR | -          | QR3sdw01.1                               | 1.81       | CaLG04 |                        |
|    |                     |     |                                                  | Ca4_12982420 - NCPGR21,         |     | -          | QR3sdw01.2                               | 5.91       |        |                        |

|    |                      |     |                                    |                                             |     |         |                      |            |             |                        |
|----|----------------------|-----|------------------------------------|---------------------------------------------|-----|---------|----------------------|------------|-------------|------------------------|
|    |                      |     | shoot dry weight (g)               | Ca4_12558541 - Ca4_11276225,                | -   |         | QR3sdw01.1           | 1.81       |             |                        |
|    |                      |     |                                    | Ca4_15651804 - TR8, Ca4_16149998 - ICCM0249 | -   |         | QR3sdw01.3           | 4.39       |             |                        |
|    |                      |     |                                    |                                             | -   |         | QR3sdw3              | 0.73       |             |                        |
|    |                      |     |                                    |                                             |     |         | QR3sdw4              | 3.15       |             |                        |
|    |                      |     | Root surface area                  | NCPGR4 - Ca6_4994876                        | SSR |         | QR3rsa02             | 7.57       | CaLG06      |                        |
|    |                      |     | Primary branches                   | CaM0812 -NCPGR164                           | SSR | 5.27    | QR3pbs02             | 8.81       | CaLG08      |                        |
|    |                      |     | Days to 50% flowering              | NCPGR164 -Ca8_3050452                       | SSR | 46.03   | 26 QTL               | 1.81-15.13 | CaLG08      |                        |
|    |                      |     | Harvest index                      | NCPGR164 -Ca8_3050452                       | SSR | 14.52   | 6 QTLs               | 5.68-15.13 | CaLG08      |                        |
|    |                      |     | Days to maturity                   | NCPGR164 -Ca8_3050452                       | SSR | 30.01   | 19 QTL               | 5.14-15.13 | CaLG08      |                        |
|    |                      |     | Drought susceptibility index (DSI) | ICCM0199c - CaM1417                         | SSR | -       | QR3dsi02             | 6.28       | CaLG07      |                        |
|    |                      |     | Drought tolerance index (DTI)      | Ca4_12558541 - Ca4_11276225,                | SSR | -       | QR3dti02             | 1.81       | CaLG04      |                        |
|    |                      |     |                                    | H2A08 - Ca1_6540035,                        |     | -       | QR3dti05             | 16.29      | CaLG01      |                        |
|    |                      |     |                                    | NCPGR164 - CISR80                           |     | -       | QR3dti06             | 15.13      | CaLG08      |                        |
| 11 | ICC 4958 × ICC 17163 | 190 | Yield per plant and                | SNP102 (86.7) to SNP104 (90.2)              | SNP | 8.0-8.5 | CaqYP2.1<br>CaqHI2.1 | 3.5        | CaLG(Chr)02 | Srivastava et al. 2016 |

|    |                     |     |                     |                                  |          |           |                                    |           |             |                        |
|----|---------------------|-----|---------------------|----------------------------------|----------|-----------|------------------------------------|-----------|-------------|------------------------|
|    |                     |     | harvest index       |                                  |          |           |                                    |           |             |                        |
|    |                     |     |                     | SNP171 (102.8) to SNP173 (106.4) | SNP      | 7.1-7.5   | <i>CaqYP3.1</i><br><i>CaqHI3.1</i> | 4.4       | aLG(Chr)03  |                        |
|    |                     |     |                     | SNP229 (96.6) to SNP231 (101.6)  | SNP      | 6.5-6.7   | <i>CaqYP4.1</i><br><i>CaqHI4.1</i> | 5.0       | CaLG(Chr)04 |                        |
|    |                     |     |                     | SNP265 (75.8) to SNP268 (77.3)   | SNP      | 8.0-8.2   | <i>CaqYP5.1</i><br><i>CaqHI5.1</i> | 1.5       | CaLG(Chr)05 |                        |
|    |                     |     |                     | SNP364 (86.4) to SNP367 (89.5)   | SNP      | 9.5-10.0  | <i>CaqYP6.1</i><br><i>CaqHI6.1</i> | 3.1       | CaLG(Chr)06 |                        |
|    |                     |     |                     | SNP420 (95.1) to SNP422 (98.0)   | SNP      | 10.8-11.5 | <i>CaqYP7.1</i><br><i>CaqHI7.1</i> | 2.9       | CaLG(Chr)07 |                        |
| 12 | ICC 4958 × ICC 1882 | 232 | Plant vigour score  | Low density- SSR                 | SSR, SNP | 7.0-32    | 5QTL                               | 2.00      | LG-4        | Sivasakthi et al. 2018 |
|    |                     |     |                     | High density- SSR + SNPs         |          | 36-39     |                                    | 0.4-2.7   | LG-4        |                        |
|    |                     |     |                     | Ultra-high density-SNPs          |          | 36.7      |                                    | 0.14      | LG-4        |                        |
|    |                     |     | 3D-leaf area        | Low density- SSR                 | SSR, SNP | 5.0-12    | 14QTL                              | 1.0-6.0   | LG-4        |                        |
|    |                     |     |                     | High density- SSR + SNPs         |          | 6.0-13    |                                    | 0.4-3.6   | LG-4        |                        |
|    |                     |     |                     | Ultra-high density-SNPs          |          | 2.3-9.8   |                                    | 0.15-13.0 | LG-4,6      |                        |
|    |                     |     | Projected leaf area | Low density- SSR                 | SSR, SNP | 60.-6.0   | 7QTL                               | 5.0-7.0   | LG-4        |                        |
|    |                     |     |                     | High density- SSR + SNPs         |          | 6.0-9.0   |                                    | 1.3-5.6   | LG-4        |                        |
|    |                     |     |                     | Ultra-high density-SNPs          |          | 5.6       |                                    | 0.05      | LG-4        |                        |

|                          |                          |          |          |       |           |        |
|--------------------------|--------------------------|----------|----------|-------|-----------|--------|
| Shoot dry weight         | Low density- SSR         | SSR, SNP | 4.0-10.0 | 12QTL | 3.0-7.0   | LG-4   |
|                          | High density- SSR + SNPs |          | 5.0-11   |       | 0.9-2.8   | LG-4   |
|                          | Ultra-high density-SNPs  |          | 9.3      |       | 0.15      | LG-4   |
| Leaf area index          | Low density- SSR         | SSR, SNP | 5.0-7.0  | 4QTL  | 4.0-7.0   | LG-4   |
|                          | High density- SSR + SNPs |          | 6.0      |       | 0.8       | LG-4   |
|                          | Ultra-high density-SNPs  |          | 5.7      |       | 0.15      | LG-4   |
| Plant height             | Low density- SSR         | SSR,SNP  | 6.0-23   | 19QTL | 2.0-8.0   | LG-4   |
|                          | High density- SSR + SNPs |          | 8.0-29   |       | 0.8-2.9   | LG-4   |
|                          | Ultra-high density-SNPs  |          | 4.9-21.7 |       | 3.4-.14   | LG-4   |
| Plant height growth rate | Low density- SSR         | SSR,SNP  | 5.0-13   | QTL   | 3.0-4.0   | LG-4   |
|                          | High density- SSR + SNPs |          | 7.0-17   |       | 1.1-4.6   | LG-4   |
|                          | Ultra-high density-SNPs  |          | 4.8-13.6 |       | 0.14-0.07 | LG-4,7 |
| Evapotranspiration       | Low density- SSR         | SSR, SNP | 5.0      | 2QTL  | 8.0       | LG-4   |
|                          | High density- SSR + SNPs |          | 4.0      |       | 0.21      | LG-4   |
|                          | Ultra-high density-SNPs  |          | -        |       | -         | -      |
| Evapotranspiration rate  | Low density- SSR         | SSR,SNP  | 6.0-8.0  | 7QTL  | 7.0-10    | LG-4   |
|                          | High density- SSR + SNPs |          | 3.0-6.0  |       | 2.0-5.0   | LG-3,4 |

|    |                  |     |                                                         |                                              |          |         |         |          |             |                     |
|----|------------------|-----|---------------------------------------------------------|----------------------------------------------|----------|---------|---------|----------|-------------|---------------------|
|    |                  |     |                                                         | Ultra-high density-SNPs                      |          | 5.7     |         | 0.48     | LG-4        |                     |
|    |                  |     | Transpiration                                           | Low density- SSR                             | SSR,SNP  | 5.0     | 4QTL    | 6.0-8.0  | LG-4,8      |                     |
|    |                  |     |                                                         | High density- SSR + SNPs                     |          | 3.0-6.0 |         | 2.9-3.5  | LG-5,8      |                     |
|    |                  |     |                                                         | Ultra-high density-SNPs                      |          | -       |         | -        | -           |                     |
|    |                  |     | Transpiration rate                                      | Low density- SSR                             | SSR,SNP  | 3.0-5.0 | 4QTL    | 5.0-13   | LG-7        |                     |
|    |                  |     |                                                         | High density- SSR + SNPs                     |          | -       |         | -        | -           |                     |
|    |                  |     |                                                         | Ultra-high density-SNPs                      |          | 5.1     |         | 0.08     | LG-3        |                     |
|    |                  |     | Residuals between 3D and projected leaf area (R-3D/PLA) | Low density- SSR                             | SSR, SNP | 6.0-13  | QTL     | 1.0-15.0 | LG-4,6,7    |                     |
|    |                  |     |                                                         | High density- SSR + SNPs                     |          | 7.0-14  |         | 0.3-4.2  | LG-1,4,6,7  |                     |
|    |                  |     |                                                         | Ultra-high density-SNPs                      |          | -       |         | -        | -           |                     |
| 13 | GPF 2 x ILWC 292 | 187 | Days to germination                                     | CNC_021165.1.18056125-CNC_021165.1.513801,   | SNP      | 4.77    | qdg-01  | 7.63     | CaLG(Chr)06 | Kushwah et al. 2022 |
|    |                  |     |                                                         |                                              |          | 4.53    | qdg-02  | 11.07    | CaLG(Chr)07 |                     |
|    |                  |     |                                                         | CNC_021166.1.34922231-CNC_021166.1.15786786  |          |         |         |          |             |                     |
|    |                  |     | Days to flowering initiation                            | CNC_021163.1.11351447-CNC_021163.1.12812015  | SNP      | 6.85    | qdfi-01 | 13.12    | CaLG(Chr)04 |                     |
|    |                  |     |                                                         | CNC_021165.1.18056125-CNC_021165.1.513801    |          | 3.29    | qdfi-02 | 7.63     | CaLG(Chr)06 |                     |
|    |                  |     | Days to 50% flowering                                   | CNC_021163.1.11351447-CNC_021163.1.12812015, | SNP      | 5.27    | qdff-02 | 13.12    | CaLG(Chr)04 |                     |
|    |                  |     |                                                         |                                              |          | 3.22    | qdff-03 | 7.63     | CaLG(Chr)06 |                     |

|                                        |                                                  |     |      |          |       |                 |
|----------------------------------------|--------------------------------------------------|-----|------|----------|-------|-----------------|
| Days to<br>100%<br>flowering;          | CNC_021163.1.11351447-<br>CNC_021163.1.12812015, | SNP | 3.40 | qdhf-02  | 13.12 | CaLG(Chr)0<br>4 |
| HI                                     | CNC_021163.1.30731371-<br>CNC_021163.1.30731330  |     | 4.65 | qhi-02   | 4.23  | CaLG(Chr)0<br>4 |
| Membrane<br>permeability<br>index;     | CNC_021165.1.1002514-<br>CNC_021165.1.8008006    | SNP | 3.89 | qmpi-02  | 16.75 | CaLG(Chr)0<br>6 |
| Relative leaf<br>water<br>content (%); | CNC_021163.1.30731371-<br>CNC_021163.1.30731330  | SNP | 3.78 | qrlwc-01 | 4.23  | CaLG(Chr)0<br>4 |

---
